# Supplementary material
Source: PubMed Central journal article supplement (PMC4112945)

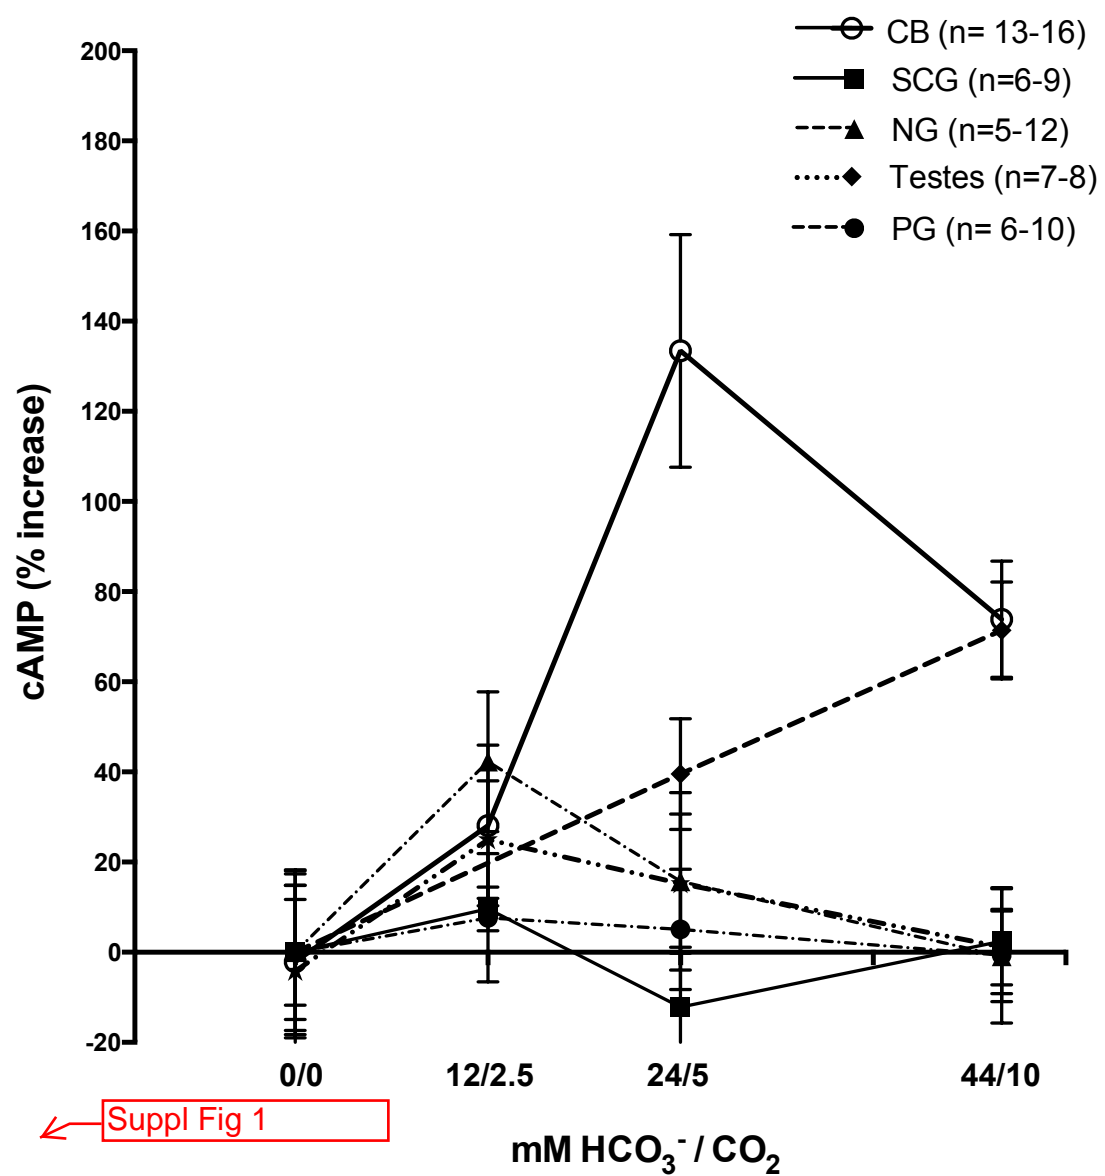

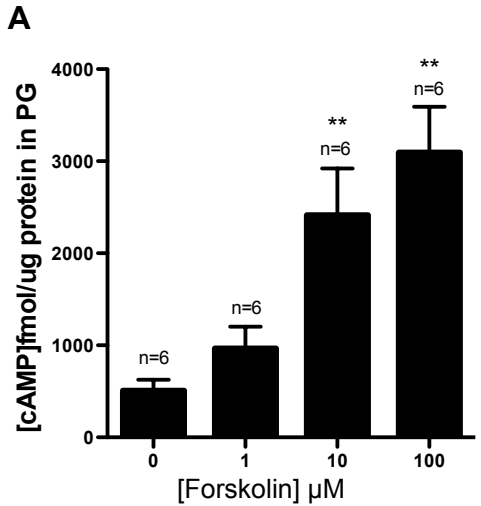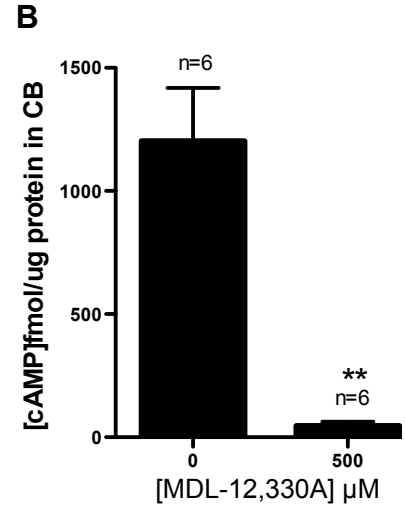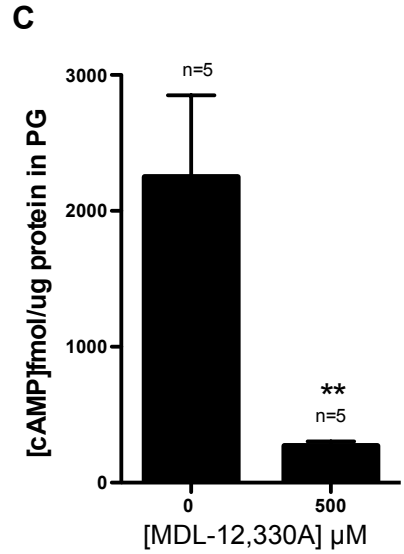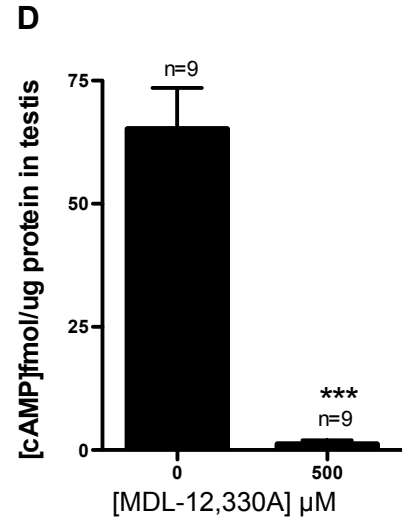

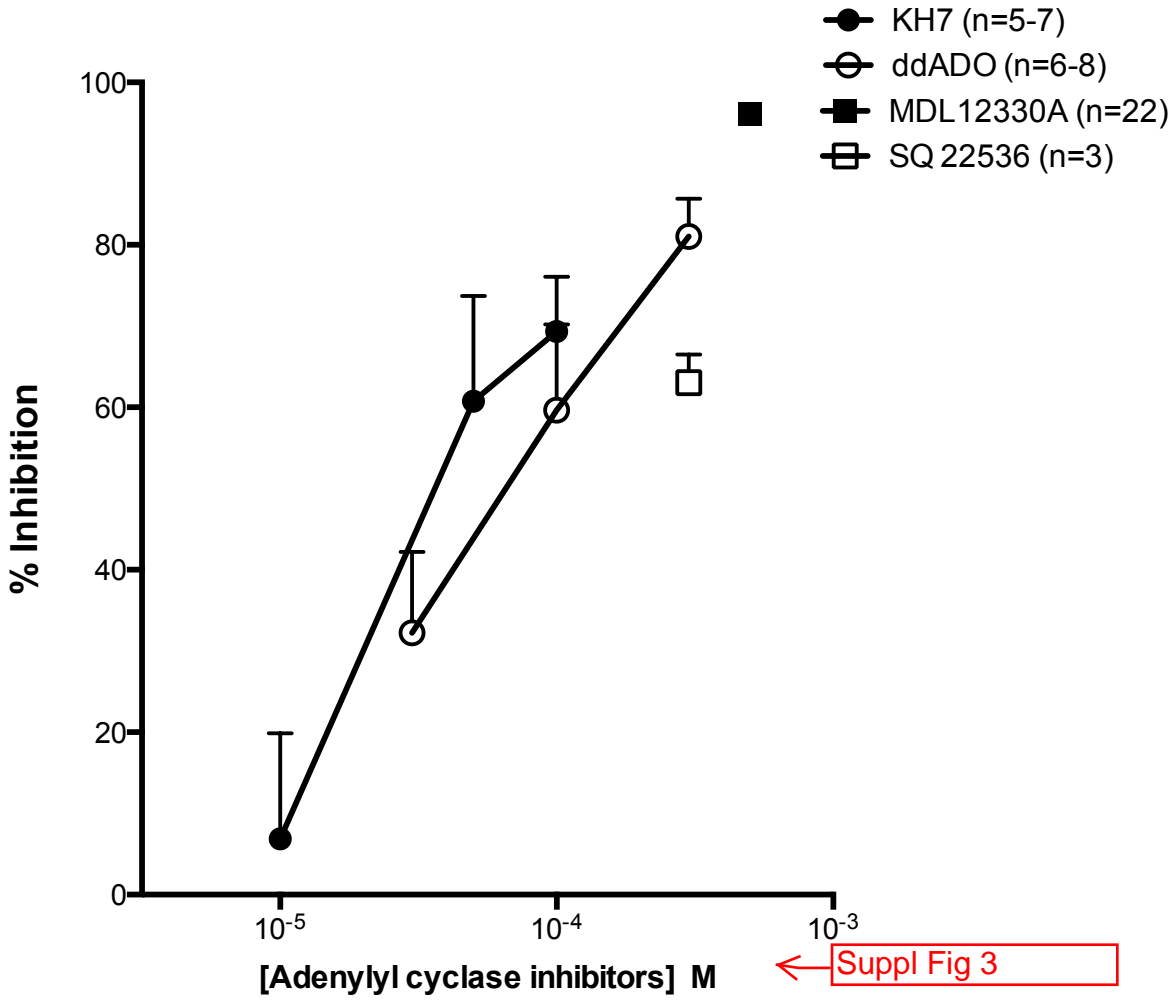

Supplement: NIHMS606904-supplement-Suppl_Figures.pdf [file NIHMS606904-supplement-Suppl_Figures.pdf]
